# Supplementary material for: The formation mechanism of multiple vacancies and amorphous graphene under electron irradiation
Source: Royal Society of Chemistry journal article supplement (doi:10.1039/c5nr00552c), 2015-01-01
Supplement: c5nr00552c1.pdf [file c5nr00552c1.pdf]

# Supporting Information

*Ruiqi Zhao*<sup>1</sup>, *Jianing Zhuang*<sup>2</sup>, *Zilin Liang*<sup>2,3</sup>, *Tianying Yan*<sup>3\*</sup>, and *Feng Ding*<sup>2\*</sup>

<sup>1</sup>School of Physics and Chemistry, Henan Polytechnic University, Henan 454003, China

<sup>2</sup>Institute of Textiles and Clothing, Hong Kong Polytechnic University, Kowloon, Hong Kong, China

<sup>3</sup>Institute of New Energy Material Chemistry, Synergetic Innovation Center of Chemical Science and Engineering (Tianjin), Tianjin Key Laboratory of Metal and Molecule Based Material Chemistry, Nankai University, Tianjin 300071, China

\*Authors to whom correspondence should be addressed: [tyan@nankai.edu.cn](mailto:tyan@nankai.edu.cn), [feng.ding@polyu.edu.hk](mailto:feng.ding@polyu.edu.hk).

## Contents:

1. **Table S1**  $E_{fs}$  of certain configurations observed in the NEMD simulation of  $V_n$ , for  $n = 4, 6,$  and  $8$ ;
2. **Table S2** The area of pentagon and heptagon of the  $5|7$  pair of certain haeckelites, and the resulted area compensation by  $5|7$  pair relative to two hexagons in the perfect graphene.
3. **Fig. S1** Probability distributions of bond lengths in representative configurations of  $V_n$ s, for  $n = 2, 4, 6,$  and  $8$ .

**Table S1**  $E_{fs}$  (eV) of certain configurations observed in the NEMD simulation of  $V_n$ s, for  $n = 4, 6,$  and  $8$ . The optimizations were performed with both REBO2 potential and DFT (in parentheses). The 5-, rotated 6-, 7-, and 8- membered rings and hole-structures are emphasized with yellow, purple, green, red, and dark purple colors, respectively. The haeckelites are distinguished by merged (M-) or separated (S-) with the total number of 5|7 pairs (see the main text).

| $V_n$ s | Representative configurations and $E_{fs}$                                                                                                                           |
|---------|----------------------------------------------------------------------------------------------------------------------------------------------------------------------|
| $V_4$   | 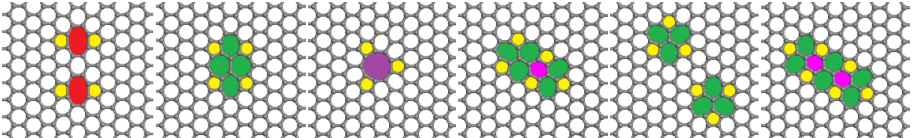<br>2-585    M-4-57    5559    M-5-57    S-6-57    M-6-57                          |
|         | 16.51(16.15)    13.01(11.77)    10.80(10.28)    11.70(10.64)    13.22(12.27)    11.36(9.96)                                                                          |
| $V_4$   | <br>S-6-57    S-7-57    S-7-57    M-7-57    S-8-57    S-8-57    58-4-85            |
|         | 12.89(12.09)    13.98(12.59)    14.09(12.72)    13.28(10.65)    14.45(12.50)    15.25(13.43)    12.66(11.36)                                                         |
| $V_6$   | <br>3-585    S-8-57    M-9-57    M-9-57    S-9-57    S-9-57    S-10-57    S-10-57 |
|         | 22.74(21.86)    17.40(15.60)    16.85(14.49)    18.79(16.17)    19.16(17.10)    19.69(17.69)    20.18(17.81)    20.79(18.22)                                         |
| $V_8$   | <br>4-585    S-10-57    S-10-57    S-11-57    S-12-57    S-12-57    hole    hole |
|         | 29.23 (27.65)    22.86 (20.77)    23.71(21.24)    25.64 (23.26)    24.63(21.74)    17.18(18.27)    17.52(18.28)    17.51(18.31)                                      |

**Table S2** The area of pentagon and heptagon of the 57 pair of certain haeckelites, and the resulted area compensation by 57 pair relative to two hexagons in the perfect graphene.

| MVs                                          | $V_4$                                                                             |                                                                                   |                                                                                    | $V_6$                                                                               | $V_8$                                                                               |
|----------------------------------------------|-----------------------------------------------------------------------------------|-----------------------------------------------------------------------------------|------------------------------------------------------------------------------------|-------------------------------------------------------------------------------------|-------------------------------------------------------------------------------------|
| Configurations                               | 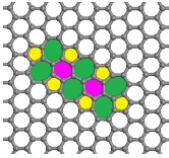 |  |  |  |  |
| Average area of pentagons ( $\text{\AA}^2$ ) | 3.59                                                                              | 3.61                                                                              | 3.62                                                                               | 3.56                                                                                | 3.66                                                                                |
| Average area of heptagons ( $\text{\AA}^2$ ) | 7.76                                                                              | 7.87                                                                              | 7.75                                                                               | 7.67                                                                                | 7.72                                                                                |
| $S_5 + S_7 = n S_6$                          | 2.15                                                                              | 2.18                                                                              | 2.16                                                                               | 2.13                                                                                | 2.16                                                                                |
| Compensation(%)                              | 45                                                                                | 54                                                                                | 56                                                                                 | 39                                                                                  | 48                                                                                  |

Note: In the perfect graphene, C-C length is 1.424  $\text{\AA}$ , and the area of a hexagon is 5.27  $\text{\AA}^2$ .

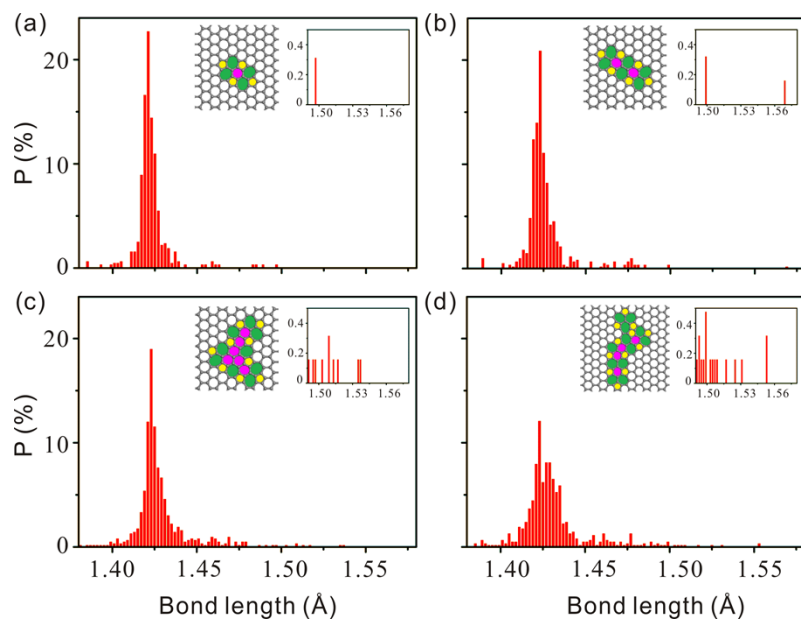

**Fig. S1** Probability distributions of bond lengths in representative configurations of  $V_nS$ :  $V_2$  (a),  $V_4$  (b),  $V_6$  (c), and  $V_8$  (d). The configurations and partial enlarged regions with bond length exceeds  $1.49 \text{ \AA}$  are also shown as insets.
